# Supplementary material for: Analysis of Charcoal Producers Perceptions of Its Production, Forest Degradation, and Governance in Wolaita, Southern Ethiopia’s Dry Afromontane Forests
Source: Hindawi journal article supplement (doi:10.1155/2023/3352702), 2023-02-23
Supplement: f1 [file 3352702.f1.docx]

## **Annexes**

**Supplementary table 1.** Summary data on determination of sample households’ size of the study Kebeles.

| Study Kebeles | Total recorded household heads | Charcoal producers | Sample respondents |
| --- | --- | --- | --- |
| *Sere Esho* | 2,523 | 2,216 | 46 |
| *Galda* | 2,447 | 2,149 | 44 |
| *Mancha Gugara* | 430 | 374 | 8 |
| Total | 5,400 | 4,739 | 98 |

Source: Survey data, woreda agricultural and trade bureau (2018/2019).

**Supplementary table 2.** Summary data on charcoal producer’s background data and the level of association, occupation, ancestry, and monthly income depending on the producer's answer based on sample size ( n = 98).

| n | Age class | Gender | Family size | Educational status | Association level | Occupation | Ancestry | Monthly income |
| --- | --- | --- | --- | --- | --- | --- | --- | --- |
| 1 | ≤19 | Male | small (≤ 4) | Non-formal | Yes | Farmers | Native | <400 |
| 2 | ≤19 | Male | small (≤ 4) | Non-formal | Yes | Farmers | Native | <400 |
| 3 | ≤19 | Male | small (≤ 4) | Non-formal | Yes | Farmers | Native | <400 |
| 4 | ≤19 | Male | small (≤ 4) | Non-formal | Yes | Farmers | Native | <400 |
| 5 | ≤19 | Male | small (≤ 4) | Non-formal | Yes | Farmers | Native | <400 |
| 6 | ≤19 | Male | small (≤ 4) | Non-formal | Yes | Farmers | Native | <400 |
| 7 | ≤19 | Male | small (≤ 4) | Non-formal | Yes | Farmers | Native | <400 |
| 8 | ≤19 | Male | small (≤ 4) | Non-formal | Yes | Farmers | Native | <400 |
| 9 | 20-43 | Male | small (≤ 4) | Non-formal | Yes | Farmers | Native | <400 |
| 10 | 20-43 | Male | small (≤ 4) | Non-formal | Yes | Farmers | Native | <400 |
| 11 | 20-43 | Male | small (≤ 4) | Non-formal | Yes | Farmers | Native | <400 |
| 12 | 20-43 | Male | Medium (5-8) | Non-formal | Yes | Farmers | Native | <400 |
| 13 | 20-43 | Male | Medium (5-8) | Non-formal | Yes | Farmers | Native | <400 |
| 14 | 20-43 | Male | Medium (5-8) | Non-formal | Yes | Farmers | Native | <400 |
| 15 | 20-43 | Male | Medium (5-8) | Non-formal | Yes | Farmers | Native | <400 |
| 16 | 20-43 | Male | Medium (5-8) | Non-formal | Yes | Farmers | Native | <400 |
| 17 | 20-43 | Male | Medium (5-8) | Non-formal | Yes | Farmers | Native | <400 |
| 18 | 20-43 | Male | Medium (5-8) | Non-formal | Yes | Farmers | Native | <400 |
| 19 | 20-43 | Male | Medium (5-8) | Non-formal | Yes | Farmers | Native | <400 |
| 20 | 20-43 | Male | Medium (5-8) | Non-formal | Yes | Farmers | Native | <400 |
| 21 | 20-43 | Male | Medium (5-8) | Non-formal | Yes | Farmers | Native | <400 |
| 22 | 20-43 | Male | Medium (5-8) | Non-formal | Yes | Farmers | Native | <400 |
| 23 | 20-43 | Male | Medium (5-8) | Non-formal | Yes | Farmers | Native | <400 |
| 24 | 20-43 | Male | Medium (5-8) | Non-formal | Yes | Farmers | Native | <400 |
| 25 | 20-43 | Male | Medium (5-8) | Non-formal | Yes | Farmers | Native | <400 |
| 26 | 20-43 | Male | Medium (5-8) | Non-formal | Yes | Farmers | Native | <400 |
| 27 | 20-43 | Male | Medium (5-8) | Non-formal | Yes | Farmers | Native | <400 |
| 28 | 20-43 | Male | Medium (5-8) | Non-formal | Yes | Farmers | Native | <400 |
| 29 | 20-43 | Male | Medium (5-8) | Non-formal | Yes | Farmers | Native | <400 |
| 30 | 20-43 | Male | Medium (5-8) | Non-formal | Yes | Farmers | Native | <400 |
| 31 | 20-43 | Male | Medium (5-8) | Non-formal | Yes | Farmers | Native | <400 |
| 32 | 20-43 | Male | Medium (5-8) | Non-formal | Yes | Farmers | Native | <400 |
| 33 | 20-43 | Male | Medium (5-8) | Non-formal | Yes | Farmers | Native | <400 |
| 34 | 20-43 | Male | Medium (5-8) | Non-formal | Yes | Farmers | Native | <400 |
| 35 | 20-43 | Male | Medium (5-8) | Non-formal | Yes | Farmers | Native | <400 |
| 36 | 20-43 | Male | Medium (5-8) | Non-formal | Yes | Farmers | Native | <400 |
| 37 | 20-43 | Male | Medium (5-8) | Non-formal | Yes | Farmers | Native | <400 |
| 38 | 20-43 | Male | Medium (5-8) | Non-formal | Yes | Farmers | Native | <400 |
| 39 | 20-43 | Male | Medium (5-8) | Non-formal | Yes | Farmers | Native | <400 |
| 40 | 20-43 | Male | Medium (5-8) | Non-formal | Yes | Farmers | Native | <400 |
| 41 | 20-43 | Male | Medium (5-8) | Non-formal | Yes | Farmers | Native | <400 |
| 42 | 20-43 | Male | Medium (5-8) | Non-formal | Yes | Farmers | Native | <400 |
| 43 | 20-43 | Male | Medium (5-8) | Non-formal | Yes | Farmers | Native | <400 |
| 44 | 20-43 | Male | Medium (5-8) | Non-formal | Yes | Farmers | Native | <400 |
| 45 | 20-43 | Male | Medium (5-8) | Non-formal | Yes | Farmers | Native | <400 |
| 46 | 20-43 | Male | Medium (5-8) | Non-formal | Yes | Farmers | Native | <400 |
| 47 | 20-43 | Male | Medium (5-8) | Non-formal | Yes | Farmers | Native | <400 |
| 48 | 20-43 | Male | Medium (5-8) | Non-formal | Yes | Farmers | Native | <400 |
| 49 | 20-43 | Male | Medium (5-8) | Non-formal | Yes | Farmers | Native | <400 |
| 50 | 20-43 | Male | Medium (5-8) | Non-formal | Yes | Farmers | Native | <400 |
| 51 | 20-43 | Male | Medium (5-8) | Non-formal | Yes | Farmers | Native | <400 |
| 52 | 20-43 | Male | Medium (5-8) | Non-formal | Yes | Farmers | Native | <400 |
| 53 | 20-43 | Male | Medium (5-8) | Non-formal | Yes | Farmers | Native | <400 |
| 54 | 20-43 | Male | Medium (5-8) | Non-formal | Yes | Farmers | Native | 400-800 |
| 55 | 20-43 | Male | Medium (5-8) | Non-formal | Yes | Farmers | Native | 400-800 |
| 56 | 20-43 | Male | Medium (5-8) | Non-formal | No | Farmers | Native | 400-800 |
| 57 | 20-43 | Male | Medium (5-8) | Non-formal | No | Farmers | Non-native | 400-800 |
| 58 | 20-43 | Male | Medium (5-8) | Non-formal | No | Farmers | Non-native | 400-800 |
| 59 | 20-43 | Male | Medium (5-8) | Primary | No | Farmers | Non-native | 400-800 |
| 60 | 20-43 | Male | Medium (5-8) | Primary | No | Farmers | Non-native | 400-800 |
| 61 | 44-67 | Male | Medium (5-8) | Primary | No | Farmers | Non-native | 400-800 |
| 62 | 44-67 | Male | Medium (5-8) | Primary | No | Farmers | Non-native | 400-800 |
| 63 | 44-67 | Male | Medium (5-8) | Primary | No | Farmers | Non-native | 400-800 |
| 64 | 44-67 | Male | Medium (5-8) | Primary | No | Farmers | Non-native | 400-800 |
| 65 | 44-67 | Male | Medium (5-8) | Primary | No | Farmers | Non-native | 400-800 |
| 66 | 44-67 | Male | Medium (5-8) | Primary | No | Farmers | Non-native | 400-800 |
| 67 | 44-67 | Male | Medium (5-8) | Primary | No | Farmers | Non-native | 400-800 |
| 68 | 44-67 | Female | Medium (5-8) | Primary | No | Farmers | Non-native | 400-800 |
| 69 | 44-67 | Female | Medium (5-8) | Primary | No | Farmers | Non-native | 400-800 |
| 70 | 44-67 | Female | Medium (5-8) | Primary | No | Farmers | Non-native | 400-800 |
| 71 | 44-67 | Female | Medium (5-8) | Primary | No | Farmers | Non-native | 400-800 |
| 72 | 44-67 | Female | Medium (5-8) | Primary | No | Farmers | Non-native | 400-800 |
| 73 | 44-67 | Female | Medium (5-8) | Primary | No | Farmers | Non-native | 400-800 |
| 74 | 44-67 | Female | Medium (5-8) | Primary | No | Farmers | Non-native | 400-800 |
| 75 | 44-67 | Female | Medium (5-8) | Primary | No | Farmers | Non-native | 400-800 |
| 76 | 44-67 | Female | Medium (5-8) | Primary | No | Farmers | Non-native | 400-800 |
| 77 | 44-67 | Female | Medium (5-8) | Secondary | No | Farmers | Non-native | 400-800 |
| 78 | 44-67 | Female | Medium (5-8) | Secondary | No | Farmers | Non-native | 400-800 |
| 79 | 44-67 | Female | Medium (5-8) | Secondary | No | Farmers | Non-native | 400-800 |
| 80 | 44-67 | Female | Large (≥ 9) | Secondary | No | Farmers | Non-native | 400-800 |
| 81 | 44-67 | Female | Large (≥ 9) | Secondary | No | Farmers | Non-native | 400-800 |
| 82 | 44-67 | Female | Large (≥ 9) | Secondary | No | Trader | Non-native | 400-800 |
| 83 | 44-67 | Female | Large (≥ 9) | Secondary | No | Trader | Non-native | 400-800 |
| 84 | ≥68 | Female | Large (≥ 9) | Secondary | No | Trader | Non-native | 400-800 |
| 85 | ≥68 | Female | Large (≥ 9) | Secondary | No | Trader | Non-native | 800-1200 |
| 86 | ≥68 | Female | Large (≥ 9) | Secondary | No | Trader | Non-native | 800-1200 |
| 87 | ≥68 | Female | Large (≥ 9) | Secondary | No | Civil servant | Non-native | 800-1200 |
| 88 | ≥68 | Female | Large (≥ 9) | Secondary | No | Civil servant | Non-native | 800-1200 |
| 89 | ≥68 | Female | Large (≥ 9) | Secondary | No | Civil servant | Non-native | 800-1200 |
| 90 | ≥68 | Female | Large (≥ 9) | Secondary | No | Civil servant | Non-native | 800-1200 |
| 91 | ≥68 | Female | Large (≥ 9) | Secondary | No | Civil servant | Non-native | 800-1200 |
| 92 | ≥68 | Female | Large (≥ 9) | Tertiary | No | Civil servant | Non-native | 800-1200 |
| 93 | ≥68 | Female | Large (≥ 9) | Tertiary | No | Civil servant | Non-native | >1200 |
| 94 | ≥68 | Female | Large (≥ 9) | Tertiary | No | Civil servant | Non-native | >1200 |
| 95 | ≥68 | Female | Large (≥ 9) | Tertiary | No | Civil servant | Non-native | >1200 |
| 96 | ≥68 | Female | Large (≥ 9) | Tertiary | No | Civil servant | Non-native | >1200 |
| 97 | ≥68 | Female | Large (≥ 9) | Tertiary | No | Investor | Non-native | >1200 |
| 98 | ≥68 | Female | Large (≥ 9) | Tertiary | No | Investor | Non-native | >1200 |

Source: Social survey data (2018/2019).

**Supplementary table 3.** Summary data on the charcoal welfare from charcoal activity, rate of human employment in the charcoal business, and causes of forest degradation according to the producer’s answer ( n = 98).

|  | Socioeconomic contribution factors | | Forest degradation factors |
| --- | --- | --- | --- |
| n | Charcoal welfare | Employment rate | Causes of forest degradation |
| 1 | Money for farming | 4 to 6 | Bush fires |
| 2 | Money for farming | 4 to 6 | Bush fires |
| 3 | Money for farming | 4 to 6 | Bush fires |
| 4 | Money for farming | 4 to 6 | Bush fires |
| 5 | Money for farming | 4 to 6 | Bush fires |
| 6 | Money for farming | 4 to 6 | Bush fires |
| 7 | Money for farming | 4 to 6 | Agriculture |
| 8 | Money for farming | 4 to 6 | Agriculture |
| 9 | Money for buying livestock | 4 to 6 | Agriculture |
| 10 | Money for buying livestock | 4 to 6 | Agriculture |
| 11 | Money for buying livestock | 4 to 6 | Agriculture |
| 12 | Money for buying livestock | 4 to 6 | Agriculture |
| 13 | Money for buying livestock | 4 to 6 | Agriculture |
| 14 | Business capital | 4 to 6 | Agriculture |
| 15 | Business capital | 4 to 6 | Agriculture |
| 16 | Business capital | 4 to 6 | Agriculture |
| 17 | Business capital | 4 to 6 | Agriculture |
| 18 | Business capital | 4 to 6 | Agriculture |
| 19 | Business capital | 4 to 6 | Agriculture |
| 20 | Business capital | 4 to 6 | Agriculture |
| 21 | Business capital | 4 to 6 | Agriculture |
| 22 | Business capital | 4 to 6 | Agriculture |
| 23 | Business capital | 4 to 6 | Agriculture |
| 24 | Business capital | 4 to 6 | Agriculture |
| 25 | Business capital | 4 to 6 | Agriculture |
| 26 | Business capital | 1 to 3 | Agriculture |
| 27 | Business capital | 1 to 3 | Agriculture |
| 28 | Business capital | 1 to 3 | Agriculture |
| 29 | Business capital | 1 to 3 | Agriculture |
| 30 | Business capital | 1 to 3 | Agriculture |
| 31 | Business capital | 1 to 3 | Agriculture |
| 32 | Clothing | 1 to 3 | Agriculture |
| 33 | Clothing | 1 to 3 | Agriculture |
| 34 | Clothing | 1 to 3 | Agriculture |
| 35 | Clothing | 1 to 3 | Agriculture |
| 36 | Clothing | 1 to 3 | Agriculture |
| 37 | Clothing | 1 to 3 | Agriculture |
| 38 | School fees | 1 to 3 | Agriculture |
| 39 | School fees | 1 to 3 | Agriculture |
| 40 | School fees | 1 to 3 | Agriculture |
| 41 | School fees | 1 to 3 | Agriculture |
| 42 | School fees | 1 to 3 | Agriculture |
| 43 | School fees | 1 to 3 | Agriculture |
| 44 | Livelihood source | 1 to 3 | Agriculture |
| 45 | Livelihood source | 1 to 3 | Agriculture |
| 46 | Livelihood source | 1 to 3 | Wood for construction and firewood |
| 47 | Livelihood source | 1 to 3 | Wood for construction and firewood |
| 48 | Livelihood source | 1 to 3 | Wood for construction and firewood |
| 49 | Livelihood source | 1 to 3 | Wood for construction and firewood |
| 50 | Livelihood source | 1 to 3 | Wood for construction and firewood |
| 51 | Livelihood source | 1 to 3 | Wood for construction and firewood |
| 52 | Livelihood source | 1 to 3 | Wood for construction and firewood |
| 53 | Livelihood source | 1 to 3 | Wood for construction and firewood |
| 54 | Livelihood source | 1 to 3 | Wood for construction and firewood |
| 55 | Livelihood source | 1 to 3 | Wood for construction and firewood |
| 56 | Livelihood source | 1 to 3 | Wood for construction and firewood |
| 57 | Livelihood source | 1 to 3 | Wood for construction and firewood |
| 58 | Livelihood source | 1 to 3 | Wood for construction and firewood |
| 59 | Livelihood source | 1 to 3 | Wood for construction and firewood |
| 60 | Livelihood source | 1 to 3 | Wood for construction and firewood |
| 61 | Livelihood source | 1 to 3 | Wood for construction and firewood |
| 62 | Livelihood source | 1 to 3 | Grazing |
| 63 | Livelihood source | 1 to 3 | Grazing |
| 64 | Livelihood source | 1 to 3 | Grazing |
| 65 | Livelihood source | 1 to 3 | Grazing |
| 66 | Livelihood source | 1 to 3 | Grazing |
| 67 | Livelihood source | 1 to 3 | Charcoal activities |
| 68 | Livelihood source | 1 to 3 | Charcoal activities |
| 69 | Livelihood source | 1 to 3 | Charcoal activities |
| 70 | Livelihood source | 1 to 3 | Charcoal activities |
| 71 | Livelihood source | 1 to 3 | Charcoal activities |
| 72 | Livelihood source | 1 to 3 | Charcoal activities |
| 73 | Livelihood source | 1 to 3 | Charcoal activities |
| 74 | Livelihood source | 1 to 3 | Charcoal activities |
| 75 | Livelihood source | 1 to 3 | Charcoal activities |
| 76 | Livelihood source | 1 to 3 | Charcoal activities |
| 77 | Livelihood source | 1 to 3 | Charcoal activities |
| 78 | Livelihood source | 1 to 3 | Charcoal activities |
| 79 | Livelihood source | 1 to 3 | Charcoal activities |
| 80 | Livelihood source | 1 to 3 | Charcoal activities |
| 81 | Livelihood source | 1 to 3 | Charcoal activities |
| 82 | Livelihood source | 1 to 3 | Charcoal activities |
| 83 | Livelihood source | 1 to 3 | Charcoal activities |
| 84 | Livelihood source | 1 to 3 | Charcoal activities |
| 85 | Livelihood source | 1 to 3 | Charcoal activities |
| 86 | Livelihood source | 1 to 3 | Charcoal activities |
| 87 | Livelihood source | 1 to 3 | Charcoal activities |
| 88 | Livelihood source | 1 to 3 | Charcoal activities |
| 89 | Livelihood source | 1 to 3 | Charcoal activities |
| 90 | Livelihood source | 1 to 3 | Charcoal activities |
| 91 | Livelihood source | 1 to 3 | Charcoal activities |
| 92 | Livelihood source | 1 to 3 | Charcoal activities |
| 93 | Livelihood source | 1 to 3 | Charcoal activities |
| 94 | Livelihood source | 1 to 3 | Charcoal activities |
| 95 | Livelihood source | 1 to 3 | Charcoal activities |
| 96 | Livelihood source | 1 to 3 | Charcoal activities |
| 97 | Livelihood source | 1 to 3 | Charcoal activities |
| 98 | Livelihood source | 1 to 3 | Charcoal activities |

Source: Social and field survey data (2018/2019).

**Supplementary table 4.** Summary data on the impact of forest degradation according to the producer’s answer ( n = 98).

| n | Negative impacts of deforestation |
| --- | --- |
| 1 | Reduced rainfall |
| 2 | Reduced rainfall |
| 3 | Reduced rainfall |
| 4 | Reduced rainfall |
| 5 | Reduced rainfall |
| 6 | Reduced rainfall |
| 7 | Reduced rainfall |
| 8 | Reduced rainfall |
| 9 | Reduced rainfall |
| 10 | Reduced rainfall |
| 11 | Reduced rainfall |
| 12 | Reduced rainfall |
| 13 | Reduced rainfall |
| 14 | Reduced rainfall |
| 15 | Reduced rainfall |
| 16 | Reduced rainfall |
| 17 | Reduced rainfall |
| 18 | Reduced rainfall |
| 19 | Reduced rainfall |
| 20 | Reduced rainfall |
| 21 | Reduced rainfall |
| 22 | Reduced rainfall |
| 23 | Reduced rainfall |
| 24 | Reduced rainfall |
| 25 | Reduced rainfall |
| 26 | Reduced rainfall |
| 27 | Reduced rainfall |
| 28 | Reduced rainfall |
| 29 | Reduced rainfall |
| 30 | Reduced rainfall |
| 31 | Reduced rainfall |
| 32 | Reduced rainfall |
| 33 | Reduced rainfall |
| 34 | Reduced rainfall |
| 35 | Reduced rainfall |
| 36 | Reduced rainfall |
| 37 | Loss of livestock pastures |
| 38 | Loss of livestock pastures |
| 39 | Loss of livestock pastures |
| 40 | Loss of livestock pastures |
| 41 | Loss of livestock pastures |
| 42 | Loss of livestock pastures |
| 43 | Loss of livestock pastures |
| 44 | Loss of livestock pastures |
| 45 | Loss of livestock pastures |
| 46 | Loss of livestock pastures |
| 47 | Loss of livestock pastures |
| 48 | Loss of livestock pastures |
| 49 | Loss of livestock pastures |
| 50 | Loss of livestock pastures |
| 51 | Loss of livestock pastures |
| 52 | Loss of livestock pastures |
| 53 | Loss of livestock pastures |
| 54 | Loss of livestock pastures |
| 55 | Loss of livestock pastures |
| 56 | Loss of livestock pastures |
| 57 | Loss of livestock pastures |
| 58 | Loss of livestock pastures |
| 59 | Soil erosion |
| 60 | Soil erosion |
| 61 | Soil erosion |
| 62 | Soil erosion |
| 63 | Soil erosion |
| 64 | Soil erosion |
| 65 | Soil erosion |
| 66 | Soil erosion |
| 67 | Soil erosion |
| 68 | Soil erosion |
| 69 | Soil erosion |
| 70 | Soil erosion |
| 71 | Soil erosion |
| 72 | Soil erosion |
| 73 | Loss of biodiversity |
| 74 | Loss of biodiversity |
| 75 | Loss of biodiversity |
| 76 | Loss of biodiversity |
| 77 | Loss of biodiversity |
| 78 | Loss of biodiversity |
| 79 | Loss of biodiversity |
| 80 | Loss of biodiversity |
| 81 | Loss of wild food/fruits |
| 82 | Loss of wild food/fruits |
| 83 | Loss of wild food/fruits |
| 84 | Loss of wild food/fruits |
| 85 | Loss of medicinal plants |
| 86 | Loss of medicinal plants |
| 87 | Loss of medicinal plants |
| 88 | Flash floods |
| 89 | Flash floods |
| 90 | Flash floods |
| 91 | Flash floods |
| 92 | Flash floods |
| 93 | Flash floods |
| 94 | Flash floods |
| 95 | Flash floods |
| 96 | Flash floods |
| 97 | Flash floods |
| 98 | Flash floods |

Source: Field survey data (2018/2019).

**Supplementary table 5.** Summary data on preferred tree species for charcoal production according to the producer’s answer ( n = 98).

| n | Tree/wood species for charcoal production with their scientific names | Local or native Wolaita names |
| --- | --- | --- |
| 1 | *Combretum molle* | Sobbuwaa |
| 2 | *Combretum molle* | Sobbuwaa |
| 3 | *Combretum molle* | Sobbuwaa |
| 4 | *Combretum molle* | Sobbuwaa |
| 5 | *Combretum molle* | Sobbuwaa |
| 6 | *Combretum molle* | Sobbuwaa |
| 7 | *Combretum molle* | Sobbuwaa |
| 8 | *Combretum molle* | Sobbuwaa |
| 9 | *Combretum molle* | Sobbuwaa |
| 10 | *Combretum molle* | Sobbuwaa |
| 11 | *Combretum molle* | Sobbuwaa |
| 12 | *Combretum molle* | Sobbuwaa |
| 13 | *Combretum molle* | Sobbuwaa |
| 14 | *Combretum molle* | Sobbuwaa |
| 15 | *Combretum molle* | Sobbuwaa |
| 16 | *Combretum molle* | Sobbuwaa |
| 17 | *Combretum molle* | Sobbuwaa |
| 18 | *Combretum molle* | Sobbuwaa |
| 19 | *Combretum molle* | Sobbuwaa |
| 20 | *Combretum molle* | Sobbuwaa |
| 21 | *Combretum molle* | Sobbuwaa |
| 22 | *Combretum molle* | Sobbuwaa |
| 23 | *Cusidate* | Wogera |
| 24 | *Cusidate* | Wogera |
| 25 | *Cusidate* | Wogera |
| 26 | *Cusidate* | Wogera |
| 27 | *Cusidate* | Wogera |
| 28 | *Terminalia schimperiana* | Ambiyaa |
| 29 | *Terminalia schimperiana* | Ambiyaa |
| 30 | *Terminalia schimperiana* | Ambiyaa |
| 31 | *Terminalia schimperiana* | Ambiyaa |
| 32 | *Terminalia schimperiana* | Ambiyaa |
| 33 | *Terminalia schimperiana* | Ambiyaa |
| 34 | *Terminalia schimperiana* | Ambiyaa |
| 35 | *Terminalia schimperiana* | Ambiyaa |
| 36 | *Terminalia schimperiana* | Ambiyaa |
| 37 | *Terminalia schimperiana* | Ambiyaa |
| 38 | *Terminalia schimperiana* | Ambiyaa |
| 39 | *Terminalia schimperiana* | Ambiyaa |
| 40 | *Terminalia schimperiana* | Ambiyaa |
| 41 | *Terminalia schimperiana* | Ambiyaa |
| 42 | *Terminalia schimperiana* | Ambiyaa |
| 43 | *Terminalia schimperiana* | Ambiyaa |
| 44 | *Syzgilem guineese* | Ochaa |
| 45 | *Syzgilem guineese* | Ochaa |
| 46 | *Syzgilem guineese* | Ochaa |
| 47 | *Syzgilem guineese* | Ochaa |
| 48 | *Syzgilem guineese* | Ochaa |
| 49 | *Syzgilem guineese* | Ochaa |
| 50 | *Syzgilem guineese* | Ochaa |
| 51 | *Syzgilem guineese* | Ochaa |
| 52 | *Syzgilem guineese* | Ochaa |
| 53 | *Syzgilem guineese* | Ochaa |
| 54 | *Olea capensis* | Meegaaraa |
| 55 | *Olea capensis* | Meegaaraa |
| 56 | *Acacia tortilis* | Oddoruwaa |
| 57 | *Acacia tortilis* | Oddoruwaa |
| 58 | *Acacia tortilis* | Oddoruwaa |
| 59 | *Acacia tortilis* | Oddoruwaa |
| 60 | *Acacia tortilis* | Oddoruwaa |
| 61 | *Acacia tortilis* | Oddoruwaa |
| 62 | *Acacia tortilis* | Oddoruwaa |
| 63 | *Acacia tortilis* | Oddoruwaa |
| 64 | *Acacia tortilis* | Oddoruwaa |
| 65 | *Acacia tortilis* | Oddoruwaa |
| 66 | *Acacia tortilis* | Oddoruwaa |
| 67 | *Acacia tortilis* | Oddoruwaa |
| 68 | *Acacia tortilis* | Oddoruwaa |
| 69 | *Acacia tortilis* | Oddoruwaa |
| 70 | *Acacia tortilis* | Oddoruwaa |
| 71 | *Acacia tortilis* | Oddoruwaa |
| 72 | *Acacia tortilis* | Oddoruwaa |
| 73 | *Acacia tortilis* | Oddoruwaa |
| 74 | *Acacia tortilis* | Oddoruwaa |
| 75 | *Acacia tortilis* | Oddoruwaa |
| 76 | *Acacia tortilis* | Oddoruwaa |
| 77 | *Acacia tortilis* | Oddoruwaa |
| 78 | *Acacia tortilis* | Oddoruwaa |
| 79 | *Acacia tortilis* | Oddoruwaa |
| 80 | *Acacia tortilis* | Oddoruwaa |
| 81 | *Acacia tortilis* | Oddoruwaa |
| 82 | *Acacia tortilis* | Oddoruwaa |
| 83 | *Acacia tortilis* | Oddoruwaa |
| 84 | *Acacia tortilis* | Oddoruwaa |
| 85 | *Acacia tortilis* | Oddoruwaa |
| 86 | *Acacia tortilis* | Oddoruwaa |
| 87 | *Acacia tortilis* | Oddoruwaa |
| 88 | *Acacia tortilis* | Oddoruwaa |
| 89 | *Acacia tortilis* | Oddoruwaa |
| 90 | *Acacia seyal* | Chachaa |
| 91 | *Acacia seyal* | Chachaa |
| 92 | *Acacia seyal* | Chachaa |
| 93 | *Acacia seyal* | Chachaa |
| 94 | *Acacia seyal* | Chachaa |
| 95 | *Acacia seyal* | Chachaa |
| 96 | *Acacia seyal* | Chachaa |
| 97 | *Acacia seyal* | Chachaa |
| 98 | *Acacia seyal* | Chachaa |

Source: Field survey data (2018/2019).

**Supplementary table 6.** Summary data on the suggestion for sustainable charcoal production according to the producer’s answer (n = 98).

| n | Suggestions for sustainable charcoal production |
| --- | --- |
| 1 | Specific tree spp. for charcoal production |
| 2 | Specific tree spp. for charcoal production |
| 3 | Specific tree spp. for charcoal production |
| 4 | Specific tree spp. for charcoal production |
| 5 | Specific tree spp. for charcoal production |
| 6 | Specific tree spp. for charcoal production |
| 7 | Specific tree spp. for charcoal production |
| 8 | Specific tree spp. for charcoal production |
| 9 | Specific tree spp. for charcoal production |
| 10 | Specific tree spp. for charcoal production |
| 11 | Specific tree spp. for charcoal production |
| 12 | Specific tree spp. for charcoal production |
| 13 | Specific tree spp. for charcoal production |
| 14 | Specific tree spp. for charcoal production |
| 15 | Specific tree spp. for charcoal production |
| 16 | Specific tree spp. for charcoal production |
| 17 | Specific tree spp. for charcoal production |
| 18 | Specific tree spp. for charcoal production |
| 19 | Specific tree spp. for charcoal production |
| 20 | Specific tree spp. for charcoal production |
| 21 | Specific tree spp. for charcoal production |
| 22 | Specific tree spp. for charcoal production |
| 23 | Specific tree spp. for charcoal production |
| 24 | Specific tree spp. for charcoal production |
| 25 | Specific tree spp. for charcoal production |
| 26 | Specific tree spp. for charcoal production |
| 27 | Specific tree spp. for charcoal production |
| 28 | Specific tree spp. for charcoal production |
| 29 | Legalization of charcoal production |
| 30 | Legalization of charcoal production |
| 31 | Legalization of charcoal production |
| 32 | Legalization of charcoal production |
| 33 | Legalization of charcoal production |
| 34 | Legalization of charcoal production |
| 35 | Legalization of charcoal production |
| 36 | Legalization of charcoal production |
| 37 | Legalization of charcoal production |
| 38 | Legalization of charcoal production |
| 39 | Legalization of charcoal production |
| 40 | Legalization of charcoal production |
| 41 | Legalization of charcoal production |
| 42 | Legalization of charcoal production |
| 43 | Legalization of charcoal production |
| 44 | Legalization of charcoal production |
| 45 | Legalization of charcoal production |
| 46 | Legalization of charcoal production |
| 47 | Legalization of charcoal production |
| 48 | Legalization of charcoal production |
| 49 | Legalization of charcoal production |
| 50 | Legalization of charcoal production |
| 51 | Charcoal producers association |
| 52 | Charcoal producers association |
| 53 | Charcoal producers association |
| 54 | Charcoal producers association |
| 55 | Charcoal producers association |
| 56 | Charcoal producers association |
| 57 | Charcoal producers association |
| 58 | Charcoal producers association |
| 59 | Charcoal producers association |
| 60 | Charcoal producers association |
| 61 | Charcoal producers association |
| 62 | Charcoal producers association |
| 63 | Charcoal producers association |
| 64 | Charcoal producers association |
| 65 | Charcoal producers association |
| 66 | Alternative charcoal production |
| 67 | Alternative charcoal production |
| 68 | Alternative charcoal production |
| 69 | Alternative charcoal production |
| 70 | Alternative charcoal production |
| 71 | Alternative charcoal production |
| 72 | Alternative charcoal production |
| 73 | Alternative charcoal production |
| 74 | Alternative charcoal production |
| 75 | Alternative charcoal production |
| 76 | Alternative charcoal production |
| 77 | Alternative charcoal production |
| 78 | Alternative charcoal production |
| 79 | Alternative charcoal production |
| 80 | Alternative charcoal production |
| 81 | Alternative charcoal production |
| 82 | Gov't tree planting payment |
| 83 | Gov't tree planting payment |
| 84 | Gov't tree planting payment |
| 85 | Gov't tree planting payment |
| 86 | Gov't tree planting payment |
| 87 | Gov't tree planting payment |
| 88 | Gov't tree planting payment |
| 89 | Gov't tree planting payment |
| 90 | Develop alternative energy source |
| 91 | Develop alternative energy source |
| 92 | Develop alternative energy source |
| 93 | Develop alternative energy source |
| 94 | Develop alternative energy source |
| 95 | Develop alternative energy source |
| 96 | Develop alternative energy source |
| 97 | Develop alternative energy source |
| 98 | Develop alternative energy source |

Source: Field/social survey data (2018/2019).
